# Supplementary material for: A hybrid-reasoner LLM framework toward real-world clinical decision- making support in acute ischemic stroke
Source: Research Square preprint supplement (doi:10.21203/rs.3.rs-7998391/v1), 2025-12-11
Supplement: Supplementary file 1 [file c0de06e794cbdbdfbc97cd58.docx]

**The Supplementary Material**

**Supplementary Figures**


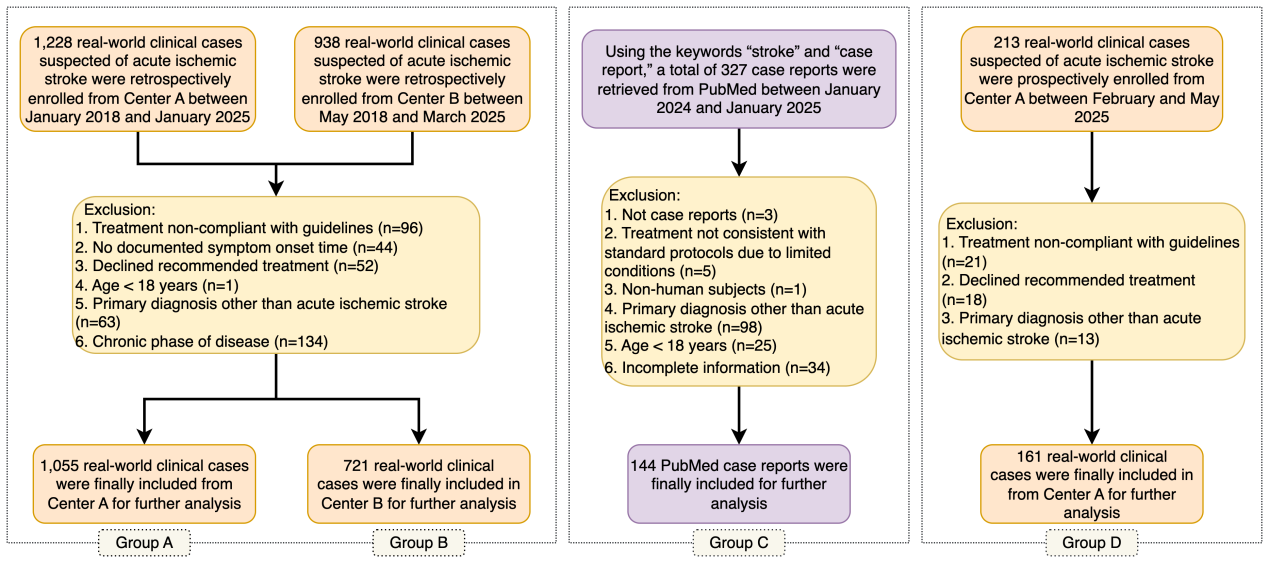


**Supplementary Figure S1. Participant flow through the study.** Flow diagram summarizing inclusion and exclusion across four datasets: Group A—retrospective cases from Center A (Jan 2018–Jan 2025) for prompt optimization and framework testing; Group B—retrospective cases from Center B (May 2018–Mar 2025) for framework testing and validation; Group C—PubMed case reports (Jan 2024–Jan 2025) for framework testing and validation; and Group D—prospective cases from Center A (Feb–May 2025) for framework validation and human–AI interaction evaluation.


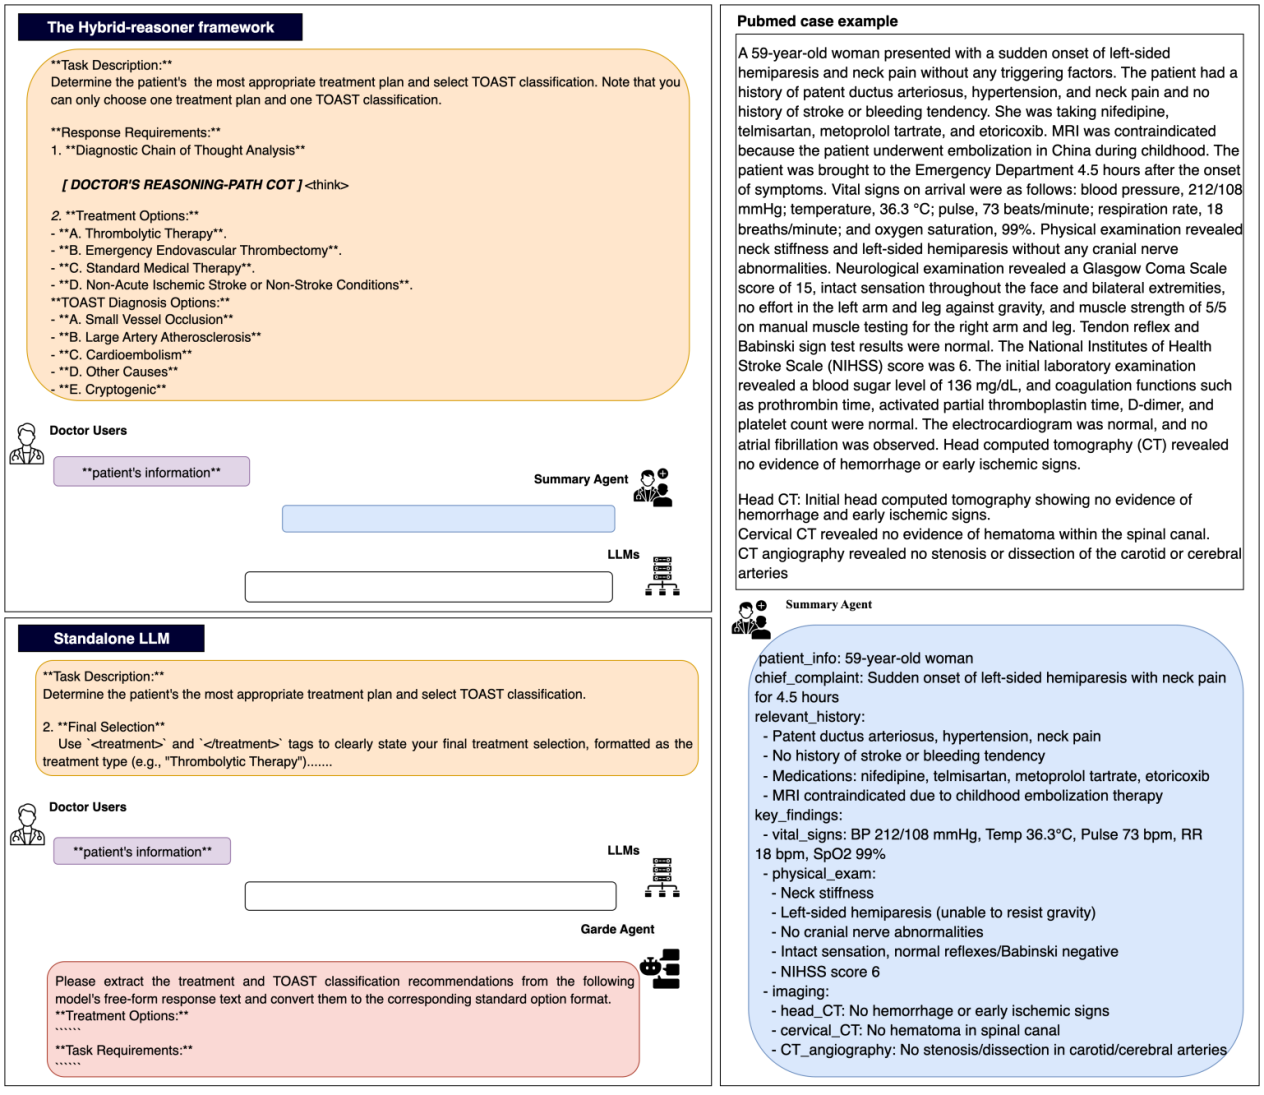


**Supplementary Figure S2. Visualization of interaction interfaces for standalone LLM and hybrid-reasoner framework augmented LLM.** Schematic illustrating the research workflow and output formats. The interface contrasts the hybrid-reasoner framework augmented LLM with standalone LLM. In first scenario, clinicians provide chain-of-thought reasoning using *<think>* tags and specify final treatment recommendation and TOAST classifications using *<treatment>* and *<diagnosis>* tags. A Summary Agent can optionally compress inputs to reduce token length. In second scenario, where responses are unconstrained, a Grade Agent extracts and standardizes answers. The right panel shows a PubMed case example demonstrating input information and structured output generation.


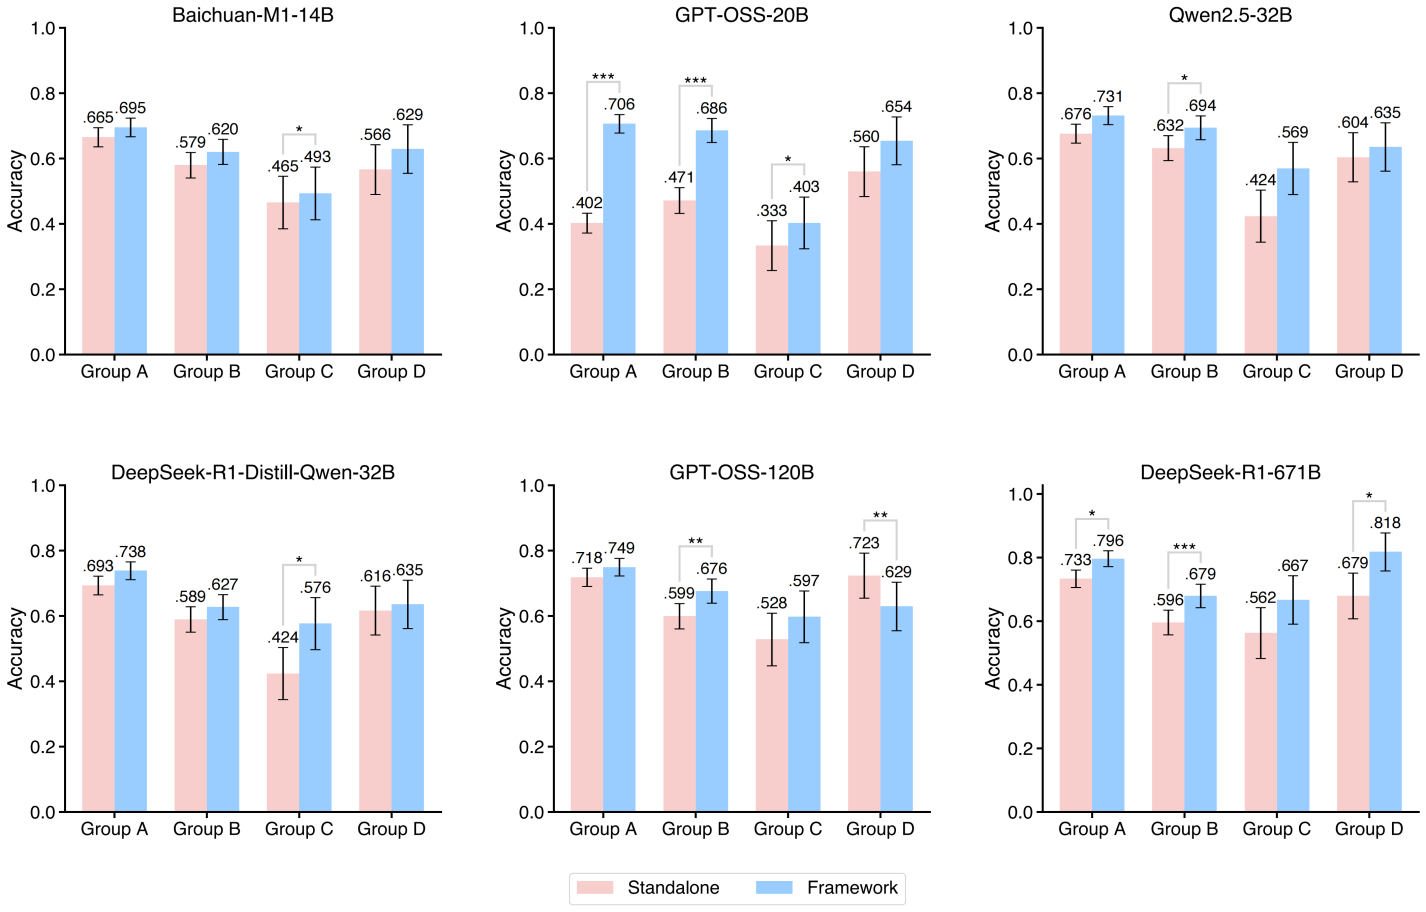


**Supplementary Material Figure S3. Hybrid-reasoner framework enhances accuracy of LLMs in TOAST classification.** ACC comparisons are shown for six LLMs of increasing scale (Baichuan-M1-14B, GPT-OSS-20B, Qwen2.5-32B, DeepSeek-R1-Distill-Qwen-32B, GPT-OSS-120B, and DeepSeek-R1-671B) across four evaluation groups (from group A to D). Within each group, paired bars represent standalone performance (pink) and Hybrid-reasoner framework augmented performance (blue).

Supplementary Table S1. Performance of LLMs in treatment recommendation and TOAST classification in Group A.

| **Models** | ACC | Standalone LLM | Hybrid-reasoner Framework | P value | F1 Score | Standalone LLM | Hybrid-reasoner Framework | P value |
| --- | --- | --- | --- | --- | --- | --- | --- | --- |
| Baichuan-M1-14B | ACC of Treatment | 0.546 (0.517, 0.576) | 0.687 (0.658, 0.713) | <0.001 | F1 of Treatment | 0.707 (0.682, 0.731) | 0.814 (0.794, 0.832) | 0.760 |
| ACC of TOAST | 0.665 (0.637, 0.695) | 0.695 (0.669, 0.724) | 0.001 | F1 of TOAST | 0.303 (0.277, 0.328) | 0.275 (0.247, 0.351) | 0.796 |
| GPT-OSS-20B | ACC of Treatment | 0.433 (0.400, 0.465) | 0.487 (0.456, 0.518) | <0.001 | F1 of Treatment | 0.604 (0.571, 0.635) | 0.655 (0.627, 0.682) | <0.001 |
| ACC of TOAST | 0.508 (0.472, 0.544) | 0.706 (0.681, 0.735) | <0.001 | F1 of TOAST | 0.224 (0.200, 0.248) | 0.235 (0.209, 0.299) | <0.001 |
| Qwen2.5-32B | ACC of Treatment | 0.574 (0.543, 0.603) | 0.697 (0.673, 0.725) | 0.009 | F1 of Treatment | 0.729 (0.704, 0.753) | 0.822 (0.804, 0.84) | <0.001 |
| ACC of TOAST | 0.678 (0.650, 0.708) | 0.731 (0.705, 0.76) | <0.001 | F1 of TOAST | 0.275 (0.241, 0.314) | 0.307 (0.271, 0.406) | 0.090 |
| DeepSeek-Distill-Qwen-32B | ACC of Treatment | 0.609 (0.579, 0.637) | 0.762 (0.735, 0.788) | <0.001 | F1 of Treatment | 0.757 (0.733, 0.778) | 0.865 (0.847, 0.882) | <0.001 |
| ACC of TOAST | 0.694 (0.665, 0.723) | 0.738 (0.709, 0.764) | <0.001 | F1 of TOAST | 0.347 (0.315, 0.383) | 0.354 (0.319, 0.388) | 0.004 |
| GPT-OSS-120B | ACC of Treatment | 0.737 (0.710, 0.763) | 0.851 (0.829, 0.872) | 0.005 | F1 of Treatment | 0.849 (0.830, 0.865) | 0.92 (0.907, 0.932) | <0.001 |
| ACC of TOAST | 0.731 (0.704, 0.76) | 0.749 (0.722, 0.777) | 0.823 | F1 of TOAST | 0.426 (0.367, 0.481) | 0.417 (0.373, 0.462) | 0.550 |
| DeepSeek-R1-671B | ACC of Treatment | 0.687 (0.658, 0.714) | 0.847 (0.826, 0.868) | <0.001 | F1 of Treatment | 0.814 (0.794, 0.833) | 0.917 (0.905, 0.929) | <0.001 |
| ACC of TOAST | 0.733 (0.705, 0.763) | 0.796 (0.770, 0.820) | 0.118 | F1 of TOAST | 0.420 (0.375, 0.459) | 0.474 (0.427, 0.520) | 0.336 |

The table presents ACC (accuracy) and F1 scores for standalone and framework-augmented LLMs in Group A, with corresponding P values for paired comparisons. Values are reported as point estimates, with 95% confidence intervals (CIs) shown in parentheses. ACC, accuracy.

Supplementary Table S2. Performance of LLMs in Treatment recommendation and TOAST classification in Group B.

| **Models** | ACC | Standalone | Hybrid-reasoner Framework | P value | F1 score | Standalone | Hybrid-reasoner Framework | P value |
| --- | --- | --- | --- | --- | --- | --- | --- | --- |
| Baichuan-M1-14B | ACC of Treatment | 0.595 (0.559, 0.631) | 0.684 (0.652, 0.718) | <0.001 | F1 of Treatment | 0.746(0.717, 0.774) | 0.812 (0.789, 0.836) | 0.190 |
| ACC of TOAST | 0.583 (0.545, 0.623) | 0.620 (0.581, 0.656) | 0.027 | F1 of TOAST | 0.267 (0.229, 0.308) | 0.262 (0.223, 0.302) | 0.044 |
| GPT-OSS-20B | ACC of Treatment | 0.459 (0.423, 0.499) | 0.592 (0.555, 0.632) | <0.001 | F1 of Treatment | 0.629 (0.594, 0.665) | 0.744 (0.714, 0.775) | <0.001 |
| ACC of TOAST | 0.576 (0.534, 0.616) | 0.686 (0.651, 0.723) | 0.001 | F1 of TOAST | 0.232 (0.200, 0.263) | 0.27 (0.228, 0.316) | <0.001 |
| Qwen2.5-32B | ACC of Treatment | 0.587 (0.551, 0.623) | 0.671 (0.638, 0.706) | 0.022 | F1 of Treatment | 0.740 (0.710, 0.768) | 0.803 (0.779, 0.828) | 0.110 |
| ACC of TOAST | 0.633 (0.592, 0.674) | 0.694 (0.656, 0.728) | 0.683 | F1 of TOAST | 0.280 (0.228, 0.335) | 0.296 (0.247, 0.344) | 0.204 |
| DeepSeek-Distill-Qwen-32B | ACC of Treatment | 0.587 (0.551, 0.623) | 0.678 (0.644, 0.714) | 0.382 | F1 of Treatment | 0.740 (0.710, 0.768) | 0.808 (0.783, 0.833) | <0.001 |
| ACC of TOAST | 0.593 (0.554, 0.629) | 0.627 (0.591, 0.664) | 0.505 | F1 of TOAST | 0.309 (0.252, 0.365) | 0.26 (0.225, 0.294) | 0.004 |
| GPT-OSS-120B | ACC of Treatment | 0.699 (0.667, 0.732) | 0.798 (0.770, 0.828) | <0.001 | F1 of Treatment | 0.823 (0.800, 0.845) | 0.887 (0.870, 0.906) | 0.042 |
| ACC of TOAST | 0.622 (0.583, 0.658) | 0.676 (0.640, 0.712) | 0.752 | F1 of TOAST | 0.315 (0.269, 0.359) | 0.353 (0.300, 0.400) | 0.004 |
| DeepSeek-R1-671B | ACC of Treatment | 0.671 (0.638, 0.705) | 0.813 (0.785, 0.841) | <0.001 | F1 of Treatment | 0.803 (0.779, 0.827) | 0.897 (0.880, 0.913) | 0.176 |
| ACC of TOAST | 0.600 (0.562, 0.634) | 0.679 (0.646, 0.715) | 0.131 | F1 score of TOAST | 0.351 (0.288, 0.404) | 0.39 (0.334, 0.442) | <0.001 |

The table reports ACC and F1 scores for standalone and framework-augmented LLMs in Group B, with corresponding P values for paired comparisons. Values are presented as point estimates, with 95% CIs shown in parentheses.

Supplementary Table S3. Performance of LLMs in treatment recommendation and TOAST classification in Group C.

| **Models** | ACC | Standalone LLM | Hybrid-reasoner Framework | P value | F1 score | Standalone LLM | Hybrid-reasoner Framework | P value |
| --- | --- | --- | --- | --- | --- | --- | --- | --- |
| Baichuan-M1-14B | ACC of Treatment | 0.507 (0.424, 0.59) | 0.667 (0.583, 0.743) | 0.011 | F1 score of Treatment | 0.673 (0.595, 0.742) | 0.800 (0.737, 0.853) | 0.872 |
| ACC of TOAST | 0.549 (0.459, 0.631) | 0.568 (0.480, 0.656) | 0.480 | F1 score of TOAST | 0.444 (0.362, 0.517) | 0.474 (0.374, 0.581) | 0.942 |
| GPT-OSS-20B | ACC of Treatment | 0.497 (0.42, 0.573) | 0.671 (0.594, 0.748) | 0.111 | F1 score of Treatment | 0.664 (0.591, 0.729) | 0.803 (0.745, 0.856) | 0.044 |
| ACC of TOAST | 0.400 (0.317, 0.483) | 0.468 (0.387, 0.565) | 1.0 | F1 score of TOAST | 0.300 (0.232, 0.361) | 0.419 (0.332, 0.507) | 0.378 |
| Qwen2.5-32B | ACC of Treatment | 0.618 (0.542, 0.701) | 0.674 (0.590, 0.743) | 0.689 | F1 score of Treatment | 0.764 (0.703, 0.824) | 0.805 (0.742, 0.853) | 0.018 |
| ACC of TOAST | 0.488 (0.400, 0.576) | 0.656 (0.576, 0.736) | 0.480 | F1 score of TOAST | 0.369 (0.296, 0.441) | 0.560 (0.447, 0.667) | 0.126 |
| DeepSeek-Distill-Qwen-32B | ACC of Treatment | 0.528 (0.451, 0.611) | 0.688 (0.604, 0.764) | 0.153 | F1 score of Treatment | 0.691 (0.622, 0.759) | 0.815 (0.753, 0.866) | 0.042 |
| ACC of TOAST | 0.496 (0.415, 0.585) | 0.664 (0.584, 0.744) | 1.0 | F1 score of TOAST | 0.393 (0.316, 0.467) | 0.534 (0.452, 0.608) | 0.498 |
| GPT-OSS-120B | ACC of Treatment | 0.597 (0.514, 0.674) | 0.750 (0.681, 0.826) | 0.677 | F1 score of Treatment | 0.748 (0.679, 0.805) | 0.857 (0.810, 0.905) | 0.002 |
| ACC of TOAST | 0.608 (0.528, 0.688) | 0.688 (0.616, 0.768) | 1.0 | F1 score of TOAST | 0.513 (0.413, 0.613) | 0.590 (0.483, 0.696) | 0.852 |
| DeepSeek-R1-671B | ACC of Treatment | 0.646 (0.562, 0.722) | 0.729 (0.653, 0.799) | 0.844 | F1 score of Treatment | 0.785 (0.720, 0.839) | 0.843 (0.790, 0.888) | 0.022 |
| ACC of TOAST | 0.648 (0.568, 0.728) | 0.768 (0.696, 0.840) | 1.0 | F1 score of TOAST | 0.558 (0.443, 0.663) | 0.708 (0.556, 0.814) | 0.460 |

The table summarizes ACC and F1 scores for standalone and framework-augmented LLMs in Group C, with corresponding P values for paired comparisons. Values are reported as point estimates, with 95% CIs shown in parentheses.

Supplementary Table S4. Performance of LLMs in treatment recommendation and TOAST classification in Group D.

| **Models** | ACC | Standalone | Hybrid-reasoner Framework | P value | F1 score | Standalone | Hybrid-reasoner Framework | P value |
| --- | --- | --- | --- | --- | --- | --- | --- | --- |
| Baichuan-M1-14B | ACC of Treatment | 0.665 (0.584, 0.739) | 0.820 (0.758, 0.876) | 0.780 | F1 of Treatment | 0.799 (0.737, 0.85) | 0.901 (0.862, 0.934) | 0.228 |
| ACC of TOAST | 0.566 (0.491, 0.648) | 0.629 (0.547, 0.704) | 0.022 | F1 of TOAST | 0.255 (0.211, 0.461) | 0.271 (0.224, 0.41) | 0.010 |
| GPT-OSS-20B | ACC of Treatment | 0.633 (0.557, 0.709) | 0.547 (0.466, 0.627) | 0.034 | F1 of Treatment | 0.775 (0.715, 0.83) | 0.707 (0.636, 0.771) | <0.001 |
| ACC of TOAST | 0.597 (0.517, 0.671) | 0.654 (0.579, 0.730) | 0.080 | F1 of TOAST | 0.312 (0.261, 0.455) | 0.249 (0.207, 0.329) | 0.474 |
| Qwen2.5-32B | ACC of Treatment | 0.727 (0.652, 0.789) | 0.783 (0.714, 0.851) | 0.025 | F1 of Treatment | 0.842 (0.789, 0.882) | 0.878 (0.833, 0.919) | 0.014 |
| ACC of TOAST | 0.604 (0.528, 0.679) | 0.635 (0.56, 0.711) | <0.001 | F1 of TOAST | 0.257 (0.216, 0.467) | 0.306 (0.251, 0.548) | 0.004 |
| DeepSeek-Distill-Qwen-32B | ACC of Treatment | 0.652 (0.578, 0.727) | 0.845 (0.789, 0.901) | <0.001 | F1 of Treatment | 0.789 (0.732, 0.842) | 0.916 (0.882, 0.948) | 0.258 |
| ACC of TOAST | 0.624 (0.548, 0.694) | 0.635 (0.560, 0.711) | 0.052 | F1 of TOAST | 0.298 (0.25, 0.542) | 0.371 (0.258, 0.548) | 0.208 |
| GPT-OSS-120B | ACC of Treatment | 0.870 (0.814, 0.919) | 0.839 (0.776, 0.894) | 0.579 | F1 of Treatment | 0.93 (0.897, 0.958) | 0.912 (0.874, 0.944) | 0.968 |
| ACC of TOAST | 0.747 (0.682, 0.818) | 0.629 (0.553, 0.704) | 0.027 | F1 of TOAST | 0.422 (0.377, 0.698) | 0.328 (0.263, 0.555) | 0.638 |
| DeepSeek-R1-671B | ACC of Treatment | 0.770 (0.702, 0.832) | 0.882 (0.826, 0.932) | <0.001 | F1 of Treatment | 0.87 (0.825, 0.908) | 0.937 (0.905, 0.965) | <0.001 |
| ACC of TOAST | 0.679 (0.604, 0.748) | 0.818 (0.755, 0.881) | 0.683 | F1 of TOAST | 0.395 (0.35, 0.644) | 0.479 (0.431, 0.628) | 0.016 |

The table shows ACC (Accuracy) and F1 scores for standalone and framework-augmented LLMs in Group D, with corresponding P values for paired comparisons. Values are presented as point estimates, with 95% CIs shown in parentheses.

Supplementary Table S5. Clinical safety indicators of LLMs during preliminary deployment.

| **Models** | Setting | Instruction coherent | 1: Factual Accuracy | 2: Logical Consistency | 3: Clinical Relevance | Overall Evaluation Score of 1-3 | Hallucination | Omission |
| --- | --- | --- | --- | --- | --- | --- | --- | --- |
| Baichuan-M1-14B | Framework | 0.994 | 3.995 | 4.390 | 3.696 | 4.027 | 18.9% | 24.3% |
| Standalone | 0.889 | 3.576 | 4.143 | 3.320 | 3.680 | 38.3% | 42.5% |
| GPT-OSS-20B | Framework | 0.801 | 3.491 | 3.723 | 2.853 | 3.356 | 33.6% | 40.4% |
| Standalone | 0.573 | 2.895 | 3.296 | 2.578 | 2.923 | 53.2% | 61.6% |
| Qwen2.5-32B | Framework | 0.997 | 4.002 | 4.383 | 3.627 | 4.004 | 26.1% | 29.8% |
| Standalone | 0.916 | 3.697 | 4.189 | 3.321 | 3.736 | 34.6% | 39.0% |
| DeepSeek-R1-Distill-Qwen32B | Framework | 0.994 | 3.988 | 4.422 | 3.616 | 4.007 | 22.3% | 23.7% |
| Standalone | 0.928 | 3.596 | 4.193 | 3.317 | 3.702 | 35.2% | 37.5% |
| GPT-OSS-120B | Framework | 0.998 | 4.227 | 4.666 | 4.0 | 4.298 | 11.7% | 14.0% |
| Standalone | 0.978 | 4.044 | 4.622 | 3.833 | 4.166 | 20.0% | 23.4% |
| DeepSeek-R1-671B | Framework | 0.998 | 4.280 | 4.760 | 4.027 | 4.355 | 10.9% | 14.7% |
| Standalone | 0.966 | 3.903 | 4.484 | 3.677 | 4.021 | 20.4% | 26.9% |

Safety metrics of LLMs in standalone and augmented settings. Overall score is the mean of factual accuracy, logical consistency, and clinical relevance. Hallucination and omission were also assessed.

| **Models** | Model size | Developer | Type | Licence | Language support | Version date | Reference |
| --- | --- | --- | --- | --- | --- | --- | --- |
| Baichuan-M1# | 14B | Baichuan-Inc | Medical | Apache License 2.0 | Chinese, English | 2025.2 | https://arxiv.org/abs/2502.12671 |
| GPT-OSS& | 20B | OpenAI | General | Apache License 2.0 | Chinese, English | 2025.8 | https://cdn.openai.com/pdf/419b6906-9da6-406c-a19d-1bb078ac7637/oai_gpt-oss_model_card.pdf |
| Qwen2.5 | 32B | Alibaba | General | Apache License 2.0 | Chinese, English | 2024.9 | https://arxiv.org/abs/2412.15115 |
| DeepSeek-R1-Distill-Qwen | 32B | DeepSeek-AI | General | MIT License | Chinese, English | 2025.2 | https://arxiv.org/abs/2501.12948 |
| GPT-OSS& | 120B | OpenAI | General | Apache License 2.0 | Chinese, English | 2025.8 | https://cdn.openai.com/pdf/419b6906-9da6-406c-a19d-1bb078ac7637/oai_gpt-oss_model_card.pdf |
| Deepseek-R1† | 671B | DeepSeek‑AI | General | MIT License | Chinese, English | 2025.5 | https://arxiv.org/abs/2501.12948 |

Supplementary Table S6. The detailed information on the six LLMs used in this study.

Detailed information on the six LLMs evaluated in this study, including model size, developer, application type, license, language support, version date, and reference source.

#Baichuan-M1 was released as a medical-domain–oriented model.

&GPT-OSS models (20B and 120B) were released by OpenAI with official model cards as technical references.

† DeepSeek-R1 and DeepSeek-R1-Distill-Qwen were developed under the MIT licence, providing large-scale general-domain models with bilingual support.
